# Supplementary material
Source: ML conference proceedings conference paper supplement (https://proceedings.neurips.cc/paper_files/paper/2023/hash/fa67d13ba6c73637593bbcc92f6400ff-Abstract.html)
Supplement: Supplementary file 1 [file fa67d13ba6c73637593bbcc92f6400ff-Supplemental-Conference.zip]

Archive with 2 entries (2 files):
- chaining_measures_supplementary.pdf
- __MACOSX/._chaining_measures_supplementary.pdf
